# Supplementary material for: Analyzing the impact of trade and investment agreements on pharmaceutical policy: provisions, pathways and potential impacts
Source: Springer Nature journal article supplement (doi:10.1186/s12992-019-0518-2), 2019-11-01
Supplement: MOESM1 [file 17445840]

**Supplementary File 1: Types of provisions in recent regional trade agreements relevant to pharmaceuticals, and location of relevant provisions in chapters, annexes and side instruments**

| Chapter/provision                                                                                                                  | TPP                                                                                              | CPTPP (TPP-11)                                                                                                                                                                                 | CETA                                                                                                                                                                                                                                               | USMCA                                                                                                                       |
|------------------------------------------------------------------------------------------------------------------------------------|--------------------------------------------------------------------------------------------------|------------------------------------------------------------------------------------------------------------------------------------------------------------------------------------------------|----------------------------------------------------------------------------------------------------------------------------------------------------------------------------------------------------------------------------------------------------|-----------------------------------------------------------------------------------------------------------------------------|
| Intellectual property chapter containing TRIPS-Plus IP provisions                                                                  | Chapter 18: Intellectual Property                                                                | Chapter 18 (some provisions suspended – see Supplementary File 2 for details)<br><br>Bilateral side letters between some countries regarding pharmaceutical marketing, Article 18.47 and 18.53 | Chapter 20: Intellectual Property                                                                                                                                                                                                                  | Chapter 20: Intellectual Property                                                                                           |
| Investment protection: Investor-state dispute settlement mechanism; investment chapter with IP covered in definition of investment | Chapter 9: Investment                                                                            | Incorporates TPP Chapter 9 (slightly narrowed scope)<br><br>Bilateral side instruments between New Zealand and Australia, Brunei, Malaysia, Peru and Viet Nam                                  | Chapter 8: Investment and Annexes 8-A to 8-F (Chapter 8 suspended until/unless ratified by each EU member state. Following signing of CETA, the ISDS rules were also substantially revised, calling for creation of an ‘Investment Court System’.) | Annex 14-D (only applies between Mexico and U.S., scaled back)                                                              |
| Procedural requirements for national pharmaceutical pricing and reimbursement programs                                             | Annex 26-A: Transparency and Procedural Fairness for Pharmaceutical Products and Medical Devices | The specific procedural rules in Annex 26-A Art 3 were suspended by CPTPP Article 2 <sup>1</sup> (other                                                                                        | N/A                                                                                                                                                                                                                                                | Chapter 29: Publication and Administration, Section B: Transparency and Procedural Fairness for Pharmaceutical Products and |

<sup>1</sup> Article 2 of the CPTPP suspends certain provisions of the TPP until they are reinstated by consensus among the Parties.

|                                                                           |                                                                                                                                                                |                                                                                           |                                                                                                                                                                                                                            |                                                                                                                                                                        |
|---------------------------------------------------------------------------|----------------------------------------------------------------------------------------------------------------------------------------------------------------|-------------------------------------------------------------------------------------------|----------------------------------------------------------------------------------------------------------------------------------------------------------------------------------------------------------------------------|------------------------------------------------------------------------------------------------------------------------------------------------------------------------|
|                                                                           | (not enforceable by state-to-state dispute settlement)                                                                                                         | provisions are retained)                                                                  |                                                                                                                                                                                                                            | Medical Devices (not enforceable)                                                                                                                                      |
| Provisions with implications for regulation of pharmaceutical marketing   | Annex 26-A, Transparency and Procedural Fairness for Pharmaceutical Products and Medical Devices, Art 4 (not enforceable by state-to-state dispute settlement) | Incorporates TPP Annex 26-A, Art 4 (not enforceable by state-to-state dispute settlement) | N/A                                                                                                                                                                                                                        | Chapter 29: Publication and Administration, Section B: Transparency and Procedural Fairness for Pharmaceutical Products and Medical Devices Art 29.8 (not enforceable) |
|                                                                           | Chapter 10: Cross-Border Trade in Services                                                                                                                     | Chapter 10: Cross-Border Trade in Services                                                | Chapter 9: Cross-Border Trade in Services                                                                                                                                                                                  | Chapter 15: Cross-Border Trade in Services                                                                                                                             |
| Regulatory requirements for assessing safety, efficacy and quality        | Chapter 8: Technical Barriers to Trade and Annex 8-C: Pharmaceuticals                                                                                          | Incorporates TPP Chapter 8 and Annex 8-C                                                  | Chapter 4: Technical Barriers to Trade, and Protocol on the Mutual Recognition of the Compliance and Enforcement Programme Regarding Good Manufacturing Practices for Pharmaceutical Products (and associated Annexes 1-3) | Chapter 11: Technical Barriers to Trade, and Chapter 12: Sectoral Annexes - Annex 12-F: Pharmaceuticals                                                                |
| Reduction/elimination of tariffs for pharmaceuticals or their ingredients | Chapter 2: National Treatment and Market Access for Goods Annex 2-D: Tariff Commitments                                                                        | Incorporates TPP Chapter 2 and Annex 2-D                                                  | N/A                                                                                                                                                                                                                        | Chapter 2: National Treatment and Market Access for Goods (and associated annexes)                                                                                     |
| Rules applying to government procurement (including pharmaceuticals)      | Chapter 15: Government Procurement, and                                                                                                                        | Incorporates TPP Chapter 15 and Annex                                                     | Chapter 19: Government Procurement                                                                                                                                                                                         | Chapter 13: Government Procurement, and                                                                                                                                |

|                                                                              |                                                                                                                                                             |                                                                |                                                                                                              |                                                                                                        |
|------------------------------------------------------------------------------|-------------------------------------------------------------------------------------------------------------------------------------------------------------|----------------------------------------------------------------|--------------------------------------------------------------------------------------------------------------|--------------------------------------------------------------------------------------------------------|
|                                                                              | Annex 15-A:<br>Government Procurement                                                                                                                       | 15-A with minor changes                                        | Annex 19-A<br>Market Access Schedule of Canada<br>Annex 19-B<br>Market Access Schedule of the European Union | Annex 13-A<br>(Government procurement schedules for Mexico and the US)                                 |
| Rules applying to state-owned enterprises including pharmaceutical companies | Chapter 17:<br>State-owned Enterprises and Designated Monopolies<br>Annex IV – State-Owned Enterprises and Designated Monopolies<br>Non-Conforming Measures | Incorporates TPP Chapter 17 and Annex IV                       | Chapter 18:<br>State Enterprises, Monopolies, and Enterprises Granted Special Rights or Privileges           | Chapter 22:<br>State-owned Enterprises and associated annexes, and Annex IV: Non-Conforming Activities |
| Procedural requirements for customs administration and trade facilitation    | Chapter 5:<br>Customs Administration and Trade Facilitation                                                                                                 | Incorporates TPP Chapter 5                                     | Chapter 6:<br>Customs and Trade Facilitation                                                                 | Chapter 7:<br>Customs Administration and Trade Facilitation                                            |
| Rules applying to regulatory practices, cooperation and coherence            | Chapter 25:<br>Regulatory Coherence                                                                                                                         | Incorporates TPP Chapter 25                                    | Chapter 21:<br>Regulatory Cooperation                                                                        | Chapter 28:<br>Good Regulatory Practices                                                               |
|                                                                              | Chapter 26:<br>Transparency and Anti-Corruption                                                                                                             | Incorporates TPP Chapter 26 (apart from TPP Annex 26-A, Art 3) | Chapter 27:<br>Transparency                                                                                  | Chapter 29:<br>Publication and Administration                                                          |
