# Supplementary material for: Analyzing the impact of trade and investment agreements on pharmaceutical policy: provisions, pathways and potential impacts
Source: Springer Nature journal article supplement (doi:10.1186/s12992-019-0518-2), 2019-11-01
Supplement: MOESM2 [file 17445840]

**Supplementary File 2: Specific TRIPS-Plus intellectual property provisions in recent regional trade agreements relevant to pharmaceuticals**

| Chapter/provision                                                                                                                                 | TPP                                                               | CPTPP (TPP-11)                                                       | CETA                                                                                                                                                                                          | USMCA                                                                                |
|---------------------------------------------------------------------------------------------------------------------------------------------------|-------------------------------------------------------------------|----------------------------------------------------------------------|-----------------------------------------------------------------------------------------------------------------------------------------------------------------------------------------------|--------------------------------------------------------------------------------------|
| Intellectual property chapter containing TRIPS-Plus IP provisions                                                                                 | Chapter 18: Intellectual Property                                 | Incorporates TPP Chapter 18 (some provisions suspended by Article 2) | Chapter 20: Intellectual Property                                                                                                                                                             | Chapter 20: Intellectual Property                                                    |
| Patents for new uses/methods/processes                                                                                                            | Art 18.37                                                         | Suspended by CPTPP Article 2                                         | N/A                                                                                                                                                                                           | Art 20.36 para 2                                                                     |
| Patent term adjustments for delays in granting patents                                                                                            | Art 18.46                                                         | Suspended by CPTPP Article 2                                         | Article 20.27 (2-5 years based on period from filing of patent application to date of marketing approval)                                                                                     | Art 20.44                                                                            |
| Patent term adjustments for delays in marketing approval process                                                                                  | Art 18.48                                                         | Suspended by CPTPP Article 2                                         |                                                                                                                                                                                               | Art 20.46                                                                            |
| Data and/or market protection for new pharmaceutical products                                                                                     | Art 18.50                                                         | Suspended by CPTPP Article 2                                         | Art 20.29 (6 years data protection + 2 years additional market protection)                                                                                                                    | Art 20.48 para 1                                                                     |
| Data and/or market protection – additional 3 years for new indications/formulations/methods of administration or 5 years for combination products | Art 18.50                                                         | Suspended by CPTPP Article 2                                         | N/A                                                                                                                                                                                           | Art 20.48 para 2 (not required for parties providing at least 8 years of protection) |
| Longer period of data and/or market protection for biologics                                                                                      | Art 18.51 – at least 8 years or at least 5 years + other measures | Suspended by CPTPP Article 2                                         | N/A                                                                                                                                                                                           | Art 20.49 10 years effective market protection                                       |
| Patent linkage                                                                                                                                    | Art 18.53                                                         | Incorporates TPP Art 18.53                                           | Not required, but where countries have linkage systems Art 20.28 provides for a new right for originator manufacturers to appeal decisions under the Notice of Compliance linkage regulations | Art 20.51                                                                            |

|                                                                                           |                                                                                                    |                                                                                                    |               |                                      |
|-------------------------------------------------------------------------------------------|----------------------------------------------------------------------------------------------------|----------------------------------------------------------------------------------------------------|---------------|--------------------------------------|
| Trade secrets protection<br>– including both civil<br>and criminal<br>enforcement         | Art 18.78                                                                                          | Incorporates<br>Art 18.78                                                                          | N/A           | Section I                            |
| TRIPS-Plus enforcement<br>including border<br>measures for suspected<br>counterfeit goods | Section I,<br>including Art<br>18.76 (special<br>requirements<br>related to<br>border<br>measures) | Section I,<br>including Art<br>18.76 (special<br>requirements<br>related to<br>border<br>measures) | Article 20.43 | Section J,<br>including<br>Art 20.84 |
